# Supplementary material
Source: PubMed Central journal article supplement (PMC2811606)
Supplement: 11606_2009_1142_MOESM1_ESM.pdf [file 11606_2009_1142_MOESM1_ESM.pdf]

# 1. Introduction

The purpose of this survey is to improve the process of obtaining in-patient consultations. The survey is anonymous. In asking these questions, we ask you to consider what you would like in an ideal consult. (Ideal -- not necessarily the reality of the real world.)

The survey consists of 16 questions and should take approx 5-7 minutes.

We realize your time is highly valuable. We will be offering a drawing for ten \$25 gift certificates to local bookstores among those completing the survey.

[While we realize this may be a small token, this is a self-funded study by residents & fellows.]

## 1. What is your current job classification?

- Resident PGY-1
- Resident PGY-2
- Resident PGY-3
- Resident PGY-4 or above
- Fellow
- Staff <5 years from training
- Staff >5 years from training

## 2. In your principal clinical duties, do you primarily request or provide consultations? (i.e. are you the primary physician asking for a consult, a consultant replying, or either/both?)

|                   | Request >90%          | Request >60%          | Approx Equal          | Provide >60%          | Provide >90%          |
|-------------------|-----------------------|-----------------------|-----------------------|-----------------------|-----------------------|
| Consultation Role | <input type="radio"/> |

## 3. With which Department(s) are you affiliated?

- Dermatology
- Emergency Medicine
- Family Practice
- Internal Medicine
- Medicine Subspecialty
- Neurology
- Pediatrics
- Pediatric Subspecialty
- Psychiatry
- Surgery (General)
- Surgical Specialty
- Other (please specify)

## 2. SubSpecialty

### 4. What is your sub-specialty?

Allergy / Immunology

Cardiology

Endocrine

GI

Hem-Onc

Infectious Disease

Pulmonary / Critical Care

Renal

Rheumatology

Other (please specify)

### 3. Surgery Specialties

5. What is your surgical specialty?

- Cardio-thoracic
- ENT
- Colorectal
- Neurosurgery
- Ophthalmology
- Orthopedics
- Pediatric
- Urology
- Other (please specify)

## 4. Importance

Please answer the following with "what you would like or consider ideal" for a consultation.

### 6. What information do you consider to be important to provide in a consult request?

|                            | Unimportant | Minimal | Moderate | Essential |
|----------------------------|-------------|---------|----------|-----------|
| Relevant Labs              | jn          | jn      | jn       | jn        |
| Current Therapy / Plan     | jn          | jn      | jn       | jn        |
| Past Medical History       | jn          | jn      | jn       | jn        |
| Patient Location           | jn          | jn      | jn       | jn        |
| Code Status                | jn          | jn      | jn       | jn        |
| Previous Consult in Field  | jn          | jn      | jn       | jn        |
| Physical Examination       | jn          | jn      | jn       | jn        |
| Who to call with response  | jn          | jn      | jn       | jn        |
| Co-morbidities             | jn          | jn      | jn       | jn        |
| Reason for Hospitalization | jn          | jn      | jn       | jn        |
| Diagnostic Work up to date | jn          | jn      | jn       | jn        |
| Consult question           | jn          | jn      | jn       | jn        |
| HPI (Brief)                | jn          | jn      | jn       | jn        |
| Urgency                    | jn          | jn      | jn       | jn        |

## 5. Communication

Reminder, please answer the questions from your perspective in your principal clinical role. (e.g asking for consults, providing consults, or both)

7. In requesting a consult, when should a requesting physician telephone the consultant?

(Check all that apply)

- Emergent
- Urgent
- Routine
- Virtually Never

8. When would it be useful to send a text message to an alphanumeric pager of a consultant or primary physician?

(Check all that apply)

- Never
- Consult Request
- Routine Recommendation
- Urgent Recommendation
- Emergent Recommendation
- General Updates
- What's an alphanumeric pager?
- Other (please specify)

9. How would you prefer to have communicated completion of a new consult with routine (non-emergent), new recommendations?

|                                       | 4 (Least) | -- 3 --> | -- 2--> | 1 (Best) |
|---------------------------------------|-----------|----------|---------|----------|
| Orally                                | jñ        | jñ       | jñ      | jñ       |
| Electronic medical record alert       | jñ        | jñ       | jñ      | jñ       |
| Written Note                          | jñ        | jñ       | jñ      | jñ       |
| Alphanumeric (digital) paging message | jñ        | jñ       | jñ      | jñ       |

## 6. Formatting of Consultations

Please answer the following with "what you would like or consider ideal" for consultations.

### 10. What is your preferred layout for a consultation response?

Separate Assessment and Recommendations

Problem specific combined Assessment/Plan

No Preference [Comments]

### 11. What is your preferred format for consult recommendations?

Bullets / Numbered items

Doesn't Matter

Free Text

Other (please specify)

### 12. Where would you like the recommendations?

On Bottom (SOAP format)

On Top (AP-SO format)

No preference [Comments]

If for any reason you can't get past this page, and have selected, "no preference" for questions 10 or 12. Type anything into the text box. We apologize for this quirk in the survey.

## 7. Recommendations

13. When a consultant recommends a new medication, how important is it that the consultant provide

|                                     | Unimportant           | Low                   | Moderate              | High                  |
|-------------------------------------|-----------------------|-----------------------|-----------------------|-----------------------|
| Commercial medication name          | <input type="radio"/> | <input type="radio"/> | <input type="radio"/> | <input type="radio"/> |
| Generic medication name             | <input type="radio"/> | <input type="radio"/> | <input type="radio"/> | <input type="radio"/> |
| Dose                                | <input type="radio"/> | <input type="radio"/> | <input type="radio"/> | <input type="radio"/> |
| Duration (or Time of Re-evaluation) | <input type="radio"/> | <input type="radio"/> | <input type="radio"/> | <input type="radio"/> |
| Alternative therapies               | <input type="radio"/> | <input type="radio"/> | <input type="radio"/> | <input type="radio"/> |

14. For specific new recommendations, how important is it to provide:

|                                              | Unimportant           | Low                   | Moderate              | High                  |
|----------------------------------------------|-----------------------|-----------------------|-----------------------|-----------------------|
| Rationale behind the recommendation          | <input type="radio"/> | <input type="radio"/> | <input type="radio"/> | <input type="radio"/> |
| Simple concise recommendation                | <input type="radio"/> | <input type="radio"/> | <input type="radio"/> | <input type="radio"/> |
| Differential Dx                              | <input type="radio"/> | <input type="radio"/> | <input type="radio"/> | <input type="radio"/> |
| Future recs based on outcome of current plan | <input type="radio"/> | <input type="radio"/> | <input type="radio"/> | <input type="radio"/> |
| References to support recommendation         | <input type="radio"/> | <input type="radio"/> | <input type="radio"/> | <input type="radio"/> |

15. When recommending follow up of an ongoing consultation related issue, the consultant should supply guidance for future management by providing:

- Scheduled clinic Appointment / Provider / Time
- Detailed outpatient management plan
- General time frame of follow up
- Other (please specify)

16. When clinical participation by a consultant is no longer needed, what's the appropriate expectation?

- Leave a periodic note to document continued awareness
- Stop following (implied - no note needed)
- Leave a sign-off note, follow peripherally
- Leave a sign-off note, stop following
- Other (please specify)
